# Supplementary material for: AlphaFold-Multimer predicts cross-kingdom interactions at the plant-pathogen interface
Source: PubMed Central journal article supplement (PMC10533508; doi:10.1038/s41467-023-41721-9), 2023-09-27
Supplement: 41467_2023_41721_MOESM1_ESM.pdf [file 41467_2023_41721_MOESM1_ESM.pdf]

## Supplementary Figures and Tables

*Alphafold-multimer predicts cross-kingdom interactions at the plant-pathogen interface*

Felix Homma, Jie Huang, Renier A. L. van der Hoorn

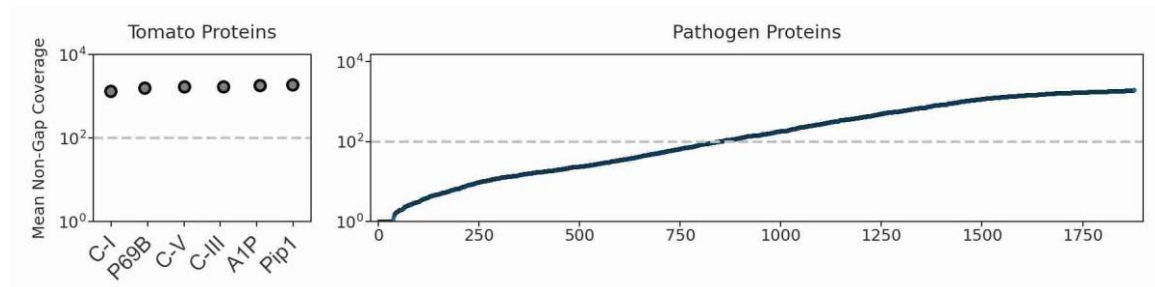

**Supplementary Figure 1** MSA depth of SSPs and hydrolases used in Fig. 2.

The mean non-gap multiple sequence alignment (MSA) depth is shown for the tomato hydrolases (left) and the 1,879 SSPs (right), ranked by MSA depth. The dash line indicates the desired minimum of 100 MSA depth.

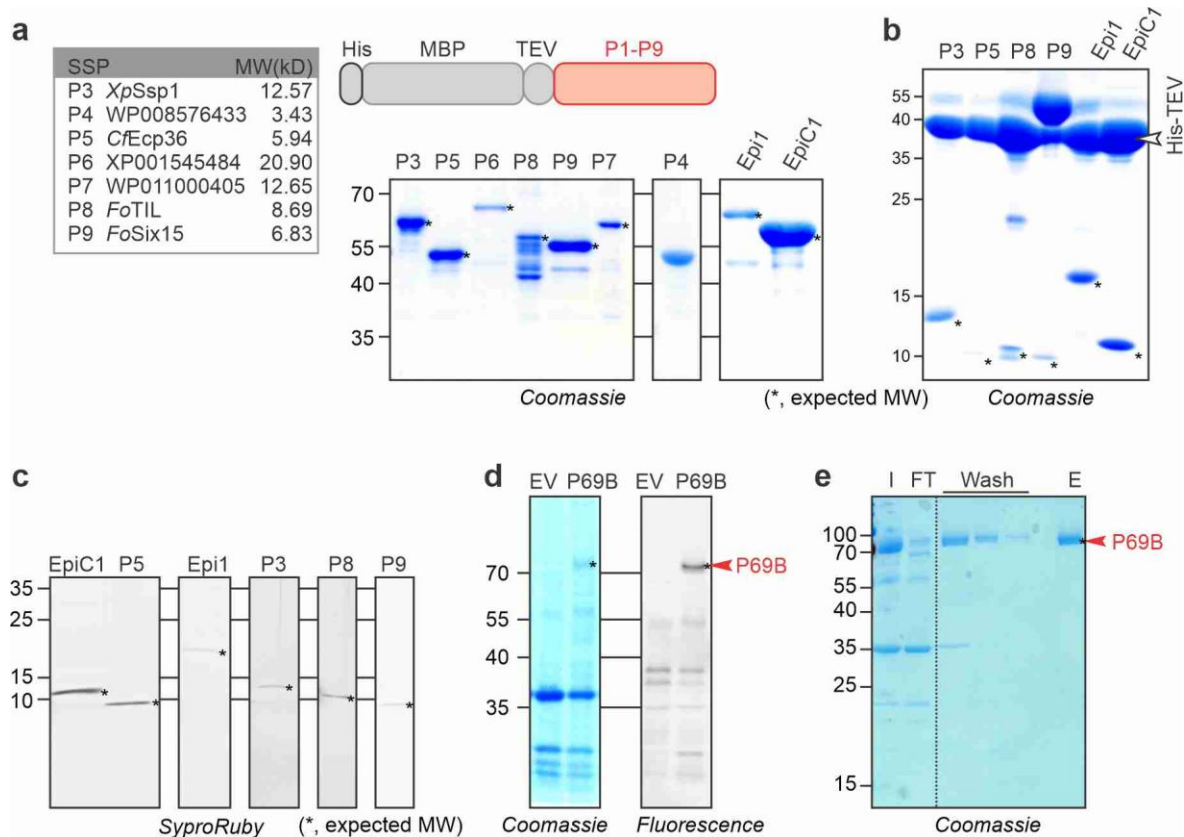

**Supplementary Figure 2** Production of candidate inhibitors and P69B for inhibition assays.

**a** Candidate inhibitors lacking their endogenous signal peptides were codon-optimized for expression in *E. coli* and cloned in-frame with a 6-His purification tag; the maltose binding protein (MBP) and the cleavage site of tobacco etch virus (TEV) protease. Fusion proteins were expressed in *E. coli* and purified on HisPur™ Ni-NTA resin and amylose resin, subsequently. Fusion proteins were detected at their predicted molecular weight (MW, \*) by SDS-PAGE and Coomassie staining. Purification of candidate inhibitors was repeated at least once for each candidate independently. **b** Putative inhibitors were released from their purification tags upon incubation with His-TEV protease. This experiment was repeated at least once for each inhibitor independently. **c** Purified inhibitor candidates after removal of their purification tags and TEV proteins, stained with Sypro Ruby. This experiment was repeated at least once for each inhibitor independently. **d** P69B-His is efficiently expressed by agroinfiltration. P69B with a C-terminal His tag and an empty vector (EV) control were transiently expressed by agroinfiltration. Apoplastic fluids were isolated, labeled with FP-TAMRA, separated on SDS-PAGE and scanned for fluorescence (right) and stained with Coomassie (left). Expression of P69B was repeated at least twice to similar effect. **e** Purification of P69B-His on Ni-NTA. I, input sample; FT, flow through; E, eluate. The MW marker is presented in kDa on the left of the gels. Purification of P69B was repeated twice with similar results.



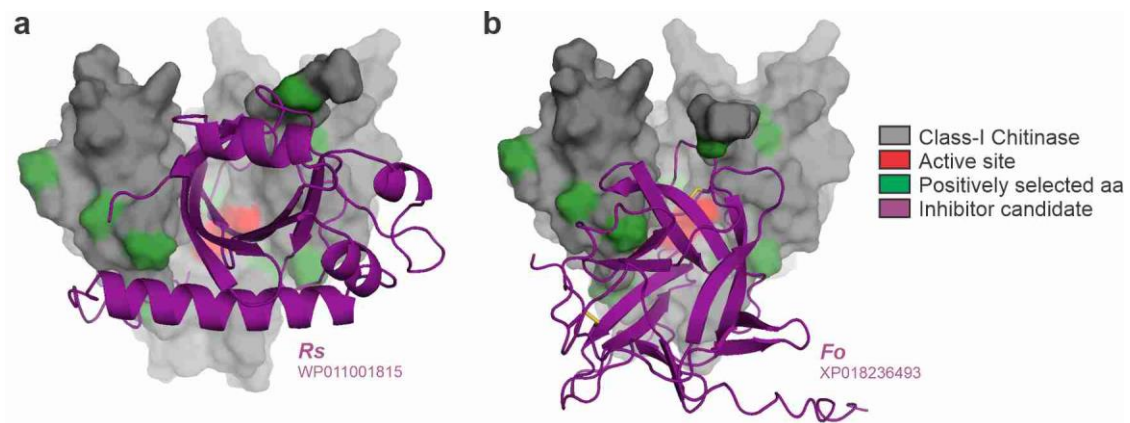

**Supplementary Figure 4** Two candidate inhibitors interact with positively selected sites in Class-I chitinases.

Positively selected sites reported previously (Bishop et al., 2000) were plotted onto the AFM-predicted models of tomato Class-I chitinase in complex with inhibitors from *Ralstonia solanacearum* (**a**) and *Fusarium oxysporum* f. sp. *lycopersici* (**b**).

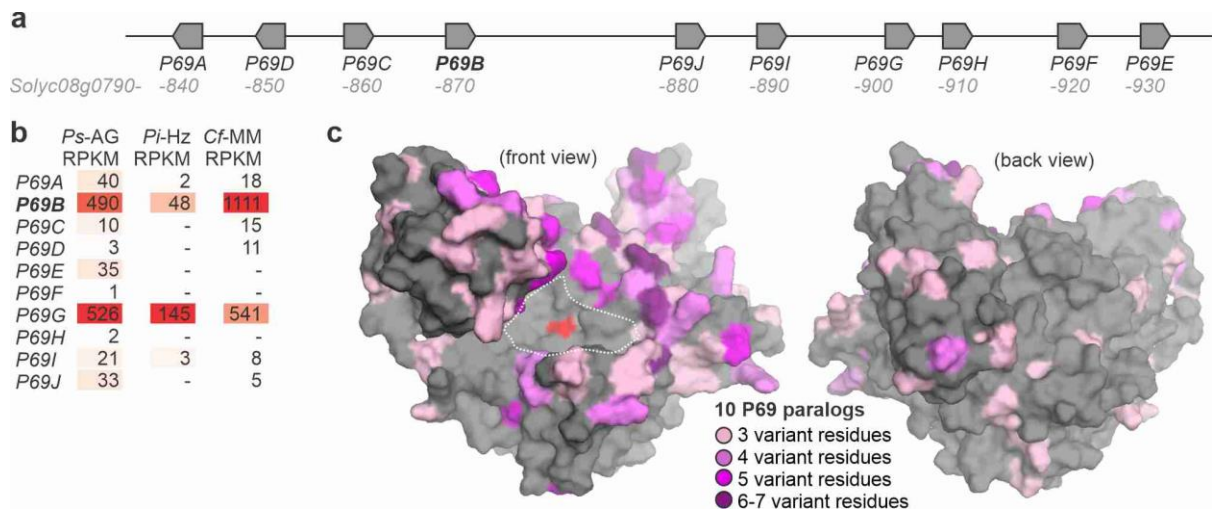

**Supplementary Figure 5** Expression and variation of the ten *P69* paralogs of tomato.

**a** Genomic *P69* cluster contains ten paralogs. Sequence was extracted from the genome of cv. Heinz (Tomato Genome Consortium, 2012). **b** Expression levels in reads per kilobase per million (RPKM) of *P69* genes in three different cultivars infected with *Ps* (cv. Ailsa Graig, Rosli et al., 2013); *Pi* (cv. Heinz, Hwang et al., 2020) and *Cf* (cv. Money Maker, Ilyas et al., 2016). **c** Protein sequences of the ten *P69* paralogs of tomato (*P60A-I*) were aligned and the number of variant residues at each position was plotted on the model of the *P69B* structure. The variation (purple) is surrounding the active site (red) in the substrate binding groove (dashed line) as a ‘ring-of-fire’.

**Supplementary Table 1** RMSD and TM scores for control complexes.

| AFM model                     | Structure | Comparison of monomers | RMSD (Å)    | TM            |
|-------------------------------|-----------|------------------------|-------------|---------------|
| Pip1-EpiC2B<br>(compatible)   | 3IMA      | Pip1 - Papain          | <b>0.94</b> | <b>0.9517</b> |
|                               |           | EpiC2B - Tarocystatin  | 2.37        | <b>0.7827</b> |
|                               |           | Interface*             | <b>0.85</b> | <b>0.89</b>   |
| P69B-Epi1a<br>(compatible)    | 1YU6      | P69B - Subtilisin      | <b>1.74</b> | <b>0.9217</b> |
|                               |           | Epi1a - OMTKY3         | <b>1.44</b> | 0.5541        |
|                               |           | Interface*             | <b>1.12</b> | <b>0.83</b>   |
| Pip1-Epi1a<br>(incompatible)  | 3IMA      | Pip1 - Papain          | <b>0.96</b> | <b>0.9509</b> |
|                               | 1YU6      | Epi1a - OMTKY3         | <b>1.72</b> | 0.5252        |
| P69B-EpiC2B<br>(incompatible) | 1YU6      | P69B - Subtilisin      | <b>1.77</b> | <b>0.9220</b> |
|                               | 3IMA      | EpiC2B - Tarocystatin  | 2.47        | <b>0.7687</b> |

\*, Calculated from the PDB files by identifying residues that have differential solvent exposure when the complex partner is omitted.

DALI was used to identify experimentally-resolved structures with similarity to AFM-predicted control complexes: tarocystatin-papain (3IMA) for Pip1-EpiC2B and subtilisin-OMTKY3 (1YU6) for P69B-Epi1a. TMalign was used to calculate TM and RMSD values for the monomers in the AFM model compared to the resolved structures. The interface was determined by selecting the residues that show different solvent exposure when the complex partner is omitted. Scores that are above the set threshold are printed in green bold and below the threshold in red.

**Supplementary Table 2** Analysed RNAseq samples

| SRA run ID | Pathogen             | Tomato cultivar  | Tissue/time  |
|------------|----------------------|------------------|--------------|
| SRR5467166 | <i>Rs</i> GMI1000 WT | 'Bonny Best'     | Petiole/3dpi |
| SRR5467167 | <i>Rs</i> GMI1000 WT | 'Bonny Best'     | Petiole/3dpi |
| SRR5467168 | <i>Rs</i> GMI1000 WT | 'Bonny Best'     | Petiole/3dpi |
| SRR6924534 | <i>Bc</i> B05.10 WT  | 'Marmande'       | Leaf/1dpi    |
| SRR6924535 | <i>Bc</i> B05.10 WT  | 'Marmande'       | Leaf/1dpi    |
| SRR6924536 | <i>Bc</i> B05.10 WT  | 'Marmande'       | Leaf/1dpi    |
| SRR6050413 | <i>Fol</i> 4287 WT   | 'Moneymaker' (S) | Root/1dpi    |
| SRR6050414 | <i>Fol</i> 4287 WT   | 'Motelle' (R)    | Root/1dpi    |
| SRR1171035 | <i>Cf</i> race-0WU   | 'Heinz Cf-0' (S) | Leaf/4dpi    |
| SRR1171040 | <i>Cf</i> race-0WU   | 'Heinz Cf-0' (S) | Leaf/8dpi    |
| SRR1171043 | <i>Cf</i> race-0WU   | 'Heinz Cf-0' (S) | Leaf/12dpi   |
| SRR1171047 | <i>Cf</i> IPO1979    | 'Moneymaker'     | Leaf/6dpi    |

**Supplementary Table 3** Transcript levels of six tomato genes in (non)infected plants

| <i>Cladosporium fulvum</i>    |                    | Day-6, susceptible tomato (n=3) Mean±SD                 |                | Day-6, resistant tomato (n=3) Mean±SD |                |
|-------------------------------|--------------------|---------------------------------------------------------|----------------|---------------------------------------|----------------|
| name                          | Accession          | Mock                                                    | <i>Cf</i>      | Mock                                  | <i>Cf</i>      |
| P69B                          | Solyc08g079870.3.1 | 352 ± 371                                               | 1111 ± 283     | 221 ± 56                              | 2628 ± 117     |
| Pip1                          | Solyc02g077040.4.1 | 223 ± 263                                               | 661±304        | 118 ± 34                              | 1358 ± 166     |
| A1P                           | Solyc08g067100.2.1 | 78 ± 8                                                  | 88 ± 4         | 72 ± 9                                | 116 ± 10       |
| C-I                           | Solyc09g098540.3.1 | 234 ± 14                                                | 195 ± 7        | 224 ± 12                              | 168 ± 13       |
| C-III                         | Solyc05g050130.4.1 | 90 ± 103                                                | 232 ± 65       | 44 ± 18                               | 377 ± 35       |
| C-V                           | Solyc07g005090.4.1 | 28 ± 9                                                  | 51 ± 9         | 24 ± 7                                | 61 ± 6         |
| <i>Fusarium oxysporum</i>     |                    | Day 1, susceptible tomato (n=1)                         |                | Day 1, resistant tomato (n=1)         |                |
| name                          | Accession          | Mock                                                    | <i>Fo</i>      | Mock                                  | <i>Fo</i>      |
| P69B                          | Solyc08g079870.1.1 | 3.69                                                    | 17.09          | 1.49                                  | 5.00           |
| Pip1                          | Solyc02g077040.2.1 | 2.14                                                    | 6.49           | 3.21                                  | 3.62           |
| A1P                           | Solyc08g067100.2.1 | 290.53                                                  | 339.77         | 285.60                                | 347.14         |
| C-I                           | Solyc09g098540.2.1 | 446.14                                                  | 316.62         | 363.06                                | 311.31         |
| C-III                         | Solyc05g050130.2.1 | 61.33                                                   | 141.36         | 60.73                                 | 89.85          |
| C-V                           | Solyc07g005090.2.1 | 172.49                                                  | 210.57         | 168.12                                | 172.49         |
| <i>Phytophthora infestans</i> |                    | Days 1/2/3, susceptible tomato, <i>Pi</i> (n=4) Mean±SD |                |                                       |                |
| name                          | Accession          | Mock                                                    | 1dpi <i>Pi</i> | 2dpi <i>Pi</i>                        | 3dpi <i>Pi</i> |
| P69B                          | Solyc08g079870.1.1 | 37 ± 1                                                  | 107 ± 3        | 48 ± 2                                | 46 ± 1         |
| Pip1                          | Solyc02g077040.2.1 | 39 ± 1                                                  | 24 ± 1         | 19 ± 1                                | 16 ± 1         |
| A1P                           | Solyc08g067100.2.1 | 48 ± 1                                                  | 60 ± 1         | 40 ± 1                                | 28 ± 1         |
| C-I                           | Solyc09g098540.2.1 | 140 ± 3                                                 | 158 ± 5        | 76 ± 1                                | 41 ± 1         |
| C-III                         | Solyc05g050130.2.1 | 13 ± 1                                                  | 131 ± 5        | 92 ± 2                                | 43 ± 2         |
| C-V                           | Solyc07g005090.2.1 | 10 ± 1                                                  | 28 ± 1         | 32 ± 1                                | 59 ± 1         |
| <i>Botrytis cinerea</i>       |                    | Day 1, susceptible tomato, WT <i>Bc</i> (n=3)           |                |                                       |                |
| name                          | Accession          | Rep1                                                    | Rep2           | Rep3                                  | Mean±SD        |
| P69B                          | Solyc08g079870.1.1 | 5.77                                                    | 2.74           | 10.18                                 | 6 ± 4          |
| A1P                           | Solyc08g067100.2.1 | 19.80                                                   | 11.35          | 20.89                                 | 17 ± 5         |
| C-I                           | Solyc09g098540.2.1 | 10.95                                                   | 4.75           | 17.27                                 | 11 ± 6         |
| C-III                         | Solyc05g050130.2.1 | 0                                                       | 0              | 0                                     | 0              |
| C-V                           | Solyc07g005090.2.1 | 265.26                                                  | 286.11         | 451.3                                 | 334 ± 102      |
| <i>Ralstonia solanacearum</i> |                    | Day-3, susceptible tomato, <i>Rs</i> (n=3)              |                |                                       |                |
| name                          | Accession          | Rep1                                                    | Rep2           | Rep3                                  | Mean±SD        |
| P69B                          | Solyc08g079870.1.1 | 503.40                                                  | 954.43         | 734.40                                | 731±226        |
| A1P                           | Solyc08g067100.2.1 | 97.34                                                   | 101.76         | 89.39                                 | 96±6           |
| C-I                           | Solyc09g098540.2.1 | 905.04                                                  | 867.27         | 871.69                                | 881±21         |
| C-III                         | Solyc05g050130.2.1 | 661.37                                                  | 1111.08        | 865.27                                | 879±225        |
| C-V                           | Solyc07g005090.2.1 | 54.25                                                   | 56.65          | 45.60                                 | 52±6           |

FPKM values of tomato genes, extracted from Ilyas et al., 2016 (*Cf*); Zhao et al., 2018 (*Fo*); Huang et al., 2020 (*Pi*); Müller et al., 2018 (*Bc*); Khokhani et al., 2017 (*Rs*).



**Supplementary Table 4** RNA-seq values of SSPs in infected plants\*

| <i>Cf</i>                        | 4dpi<br>SRR1171035           | 6dpi<br>SRR1171047        | 8dpi<br>SRR1171040  | 12dpi<br>SRR1171043 | Mean( $\pm$ SD)     |
|----------------------------------|------------------------------|---------------------------|---------------------|---------------------|---------------------|
| KAH3648627<br>( <i>CfEcp36</i> ) | 212.485                      | 436.287                   | 578.257             | 691.188             | 479.55 $\pm$ 206.34 |
| <i>Fo</i>                        | MoneyMaker (S)<br>SRR6050413 | Motelle (R)<br>SRR6050414 | Mean( $\pm$ SD)     |                     |                     |
| XP018243121 ( <i>FoTIL</i> )     | 180                          | 461                       | 340.50 $\pm$ 198.70 |                     |                     |
| APP91304 ( <i>FoSix15</i> )      | 270.034                      | 144.81                    | 207.42 $\pm$ 88.55  |                     |                     |
| XP018236493                      | 204.966                      | 227.051                   | 216.01 $\pm$ 15.62  |                     |                     |
| XP018248187                      | 5.39765                      | 5.71688                   | 5.56 $\pm$ 0.23     |                     |                     |
| XP018241286                      | 1.79816                      | 5.8976                    | 3.85 $\pm$ 2.90     |                     |                     |
| <i>Rs</i>                        | SRR5467166                   | SRR5467167                | SRR5467168          | Mean( $\pm$ SD)     |                     |
| WP011000405                      | 0                            | 6.374                     | 13.972              | 6.78 $\pm$ 6.99     |                     |
| WP011001815                      | 528.431                      | 656.721                   | 612.85              | 599.33 $\pm$ 65.20  |                     |
| WP011002292                      | 2.7102                       | 2.8454                    | 3.11861             | 2.89 $\pm$ 0.21     |                     |
| <i>Bc</i>                        | SRR6924534                   | SRR6924535                | SRR6924536          | Mean( $\pm$ SD)     |                     |
| XP001545484                      | 2.47535                      | 2.34842                   | 2.50272             | 2.44 $\pm$ 0.82     |                     |
| XP001560184                      | 71.8476                      | 79.0248                   | 27.7998             | 59.56 $\pm$ 27.7    |                     |

\*, all values are in transcripts per million (TPM) reads of the pathogen during infection of tomato. Infection of *Rs* and *Bc* was at 72 and 24 hpi, respectively.

**Supplementary Table 5** RMSD and TM scores for the hydrolases in 15 SPP-hydrolase complexes

| Hydrolase | SSP                        | PDB  | Protein(s) in PDB      | RMSD (Å)    | TM          |
|-----------|----------------------------|------|------------------------|-------------|-------------|
| P69B      | WP046932418- <i>XpSsp</i>  | 1YU6 | Subtilisin-OMTKY3      | <b>1.7</b>  | <b>0.92</b> |
| P69B      | KAH3648627- <i>CfEcp36</i> | 1YU6 | Subtilisin-OMTKY3      | <b>1.7</b>  | <b>0.92</b> |
| P69B      | XP018243121- <i>FoTIL</i>  | 1YU6 | Subtilisin-OMTKY3      | <b>1.7</b>  | <b>0.92</b> |
| P69B      | APP91304- <i>FoSix15</i>   | 1YU6 | Subtilisin-OMTKY3      | <b>1.7</b>  | <b>0.92</b> |
| P69B      | XP001545484                | 1YU6 | Subtilisin-OMTKY3      | <b>1.7</b>  | <b>0.92</b> |
| P69B      | WP011000405                | 1YU6 | Subtilisin-OMTKY3      | <b>1.8</b>  | <b>0.92</b> |
| P69B      | WP008576433                | 1YU6 | Subtilisin-OMTKY3      | <b>1.8</b>  | <b>0.92</b> |
| C-I       | WP011001815                | 3IWR | Rice class-I chitinase | <b>1.4</b>  | <b>0.95</b> |
| C-I       | XP018236493                | 3IWR | Rice class-I chitinase | <b>1.4</b>  | <b>0.92</b> |
| C-III     | WP046931881                | 4TOQ | Class-III chitinase    | <b>0.75</b> | <b>0.97</b> |
| C-III     | XP001560184                | 4TOQ | Class-III chitinase    | <b>0.76</b> | <b>0.97</b> |
| C-III     | XP018248187                | 4TOQ | Class-III chitinase    | <b>0.79</b> | <b>0.97</b> |
| C-III     | XP018241286                | 4TOQ | Class-III chitinase    | <b>0.86</b> | <b>0.97</b> |
| C-V       | WP008572913                | 3ALG | Class-V chitinase      | <b>1.4</b>  | <b>0.94</b> |
| A1P       | WP011002292                | 4ZL4 | Plasmepsin             | <b>3.0</b>  | <b>0.73</b> |

DALI was used to identify the experimentally resolved structure that is closest to that of the hydrolase in the SPP-hydrolase complex and the RMSD and TM scores were calculated for each comparison with TAlign. Scores that are above the set threshold are printed in green bold and below the threshold in red.

**Supplementary Table 6** RMSD and TM scores for the SSPs in 15 SPP-hydrolase complexes

| SSP                        | PDB  | RMSD (Å)   | TM          |
|----------------------------|------|------------|-------------|
| WP046932418- <i>XpSsp</i>  | x    | x          | x           |
| KAH3648627- <i>CfEcp36</i> | 6NK9 | <b>1.9</b> | <b>0.63</b> |
| XP018243121- <i>FoTIL</i>  | x    | x          | x           |
| APP91304- <i>FoSix15</i>   | x    | x          | x           |
| XP001545484                | 1WPX | 2.6        | 0.68        |
| WP011000405                | x    | x          | x           |
| WP008576433                | x    | x          | x           |
| WP011001815                | 5UC0 | 4.7        | 0.53        |
| XP018236493                | 4I1B | 3.6        | 0.62        |
| WP046931881                | 4MIS | 2.2        | 0.70        |
| XP001560184                | 3TC2 | 3.7        | 0.61        |
| XP018248187                | 5FJQ | 2.7        | 0.46        |
| XP018241286                | 4OWL | 3.0        | 0.70        |
| WP008572913                | 1Y34 | 2.8        | 0.66        |
| WP011002292                | 2HOD | 3.0        | 0.61        |

DALI was used to identify the resolved structure that is closest to that of the SSP in the SPP-hydrolase complex and the RMSD and TM scores were calculated for each comparison with TMalign. Scores that are above the set threshold are printed in green bold and below the threshold in red. No good structures were identified for several complexes (x).

**Supplementary Table 7 Synthesised nucleotide sequences**

|                                                                                                                                                                                                                                                                                                                                                                                                                                                                                                                                                                                                                                                                                                                                                                                                                                                                                                                                                                                                                                                                                                                                                                                                                                                                                                                                                                                                                                                                                                                                                                                                                                                                                                                                                                                      |
|--------------------------------------------------------------------------------------------------------------------------------------------------------------------------------------------------------------------------------------------------------------------------------------------------------------------------------------------------------------------------------------------------------------------------------------------------------------------------------------------------------------------------------------------------------------------------------------------------------------------------------------------------------------------------------------------------------------------------------------------------------------------------------------------------------------------------------------------------------------------------------------------------------------------------------------------------------------------------------------------------------------------------------------------------------------------------------------------------------------------------------------------------------------------------------------------------------------------------------------------------------------------------------------------------------------------------------------------------------------------------------------------------------------------------------------------------------------------------------------------------------------------------------------------------------------------------------------------------------------------------------------------------------------------------------------------------------------------------------------------------------------------------------------|
| <p><b>P69B Fragment-1</b><br/>           GAAGACATAATGGGATTTGTTCTCTTTTCACAATTGCCTTCATTTCTTCTGTCTCTACACTTCTCTTATTCCT<br/>           AGTAATATCCCACCTTTGCCGTGCAGGAGGTAATTTAGAGACTTACATCGTCCACGTGGAGAGTCCAGAAT<br/>           CTTTGGTCACCACCTCAATCACTCTTGACAGATTTGGGTAGTACTATCTTTCCCTTTCTGCCAAAACGGCTAC<br/>           TACGATCTCCTCAAGTGCCAACGAGGAAGCCGCGACAATGATTTACTCATATCATAACGTAATGACTGGTT<br/>           TCGCAGCTAGATTAAGTGTGAGCAGGTCAAAGAAAATGGAAAAGAAAACATGGATTTGTGTCCGCACAGAA<br/>           GCAAAGAATCTTGAGCCTACATACTACACACACTCCTAGTTTCCTTGGTTTACAGCAAAAATATGGGCGTTTG<br/>           GAAGGACTCAAATTATGGTAAGGGAGTGATCATTGGTGTAATTGATACAGGTATCATTCCCACCATCCCA<br/>           GCTTTAGTGATGTTGGCATGCCCCGCCACCTGCAAAAATGGAAAAGGTGTTTGCAGTCTAATTTTACTAATA<br/>           AGTGTAATAACAAGCTTATAGGTGCCGATCTTACCAACTAGGTAATGGTTCCCAATTGATTCTATAGGGC<br/>           ACGGAACGCACACAGCTACTGCTGCCGGCGCTTTCGTAAAAGGAGCCAACGTGTATGGTAATGCCGAC<br/>           GGAACAGCCGTAGGGGTGGCACCATTAGCTCATATTGCTATTTATAAAGTCTGCAATTCAGTTGGTTGTTC<br/>           GAGTCAGACGTACTTGCAGCCATGGACTCCGCAATAGACGATGGTGTGATATACTTTCTATGTCTTTGTCT<br/>           GGAGGTCCGATTCCTTTTACCGGGACAATATCGCTATAGGGGCTATAGTGCTACTGAACGTGGAATCCTC<br/>           GTTCTTGTTCAGCTGGTAATAGTGGACCTTCCTTTATTACAGCTGTCAATACCGCTCCTTGGATTCTAAGT<br/>           TCGGAGCTTCCACTTTGGACCGTAAGATTAAGGCAACTGTGAAAATGGGCAACGGTGAGGAATTTGAAGGA<br/>           GAATCAGCATATCGTCCTAAGATAAGCAATGCTACATTTTACACTCTTTGATGCGGCAAGAACGCTAA<br/>           AGACCTAGCGAAAACCCCTATTGTGCGCAGGGGAAGTGAACAGACCCTGCTATCAGGGGTAAGGATGTTT<br/>           TCTGCAGTGTCTGGGACATGTTGCAACGTTGATAAAGGACAGGCGGTAAAGGACCTGGTGGAGTTGGA<br/>           ATGATAATCATAAATCCAAGTCAGTATGGAGTAACCAAGTCTGCTGATGCTCATGTGTTGCCGTCTCGTA<br/>           GTGAGCGCCGCTGATGGTATGTCTC</p> |
| <p><b>P69B Fragment-2</b><br/>           GAAGACATTGGTACTAAGATATTGGCATATATGAACTCTACTAGCTCTCCAGTAGCCACAATTGCATTTAG<br/>           GGAACGATCATTGGTGACAAGAACGCACCGATGGTTGCGGCATTTAGTTCCCGAGGCCCCTTACAGTGCATC<br/>           CCCTGGTATCCTCAAGCCTGATATCATTGGACCTGGCGCAACATACTTCCCGCATGGCCTACTTCAAGTGA<br/>           TGACAATAAGAACACAAAAGTCTACTTTTAAATAAATTAGTGGTACAAGCATGTCCTGTCCCACTGCTGG<br/>           AGTAGCTGCACTGCTTAAATGTACGCATCCAGATTGGTACCAGCTGTTATAAAGAGCGCTATGATGACGA<br/>           CCGCTGACACCTTGAACCTCGCAAACCTCTCCTATTCTTGACGAGCGTTTGGCTCCAGCTGACATCTATGCA<br/>           TAGGCGCCGGACATGTGAATCCGAGTAGGGCTAATGACCCAGGGTTGGTGTACGATACTCCTTTCGAAGAT<br/>           TACGTCCCATATCTCTGTGGACTTAAATATACGGATCAACAGGTTGGTAATTTAATTCAAAGACGTGAAAC<br/>           TGTTCCGAAGTTAAGAGCATCTTGGAAAGCTCAACTGAATTATCCAGTTTTTCTATTTTTGGACTAGGAAGT<br/>           ACTCCTCAGACTTATAACAAGACTGTGACTAATGTGCGAGATGCAACATCTTCTACAAAGTTGAGGTTGC<br/>           CAGCCCTGAAGGGTTCGAAATCGAAGTTGAACCTAGCAGGCTTAACTTTTCCGAGCTAAATCAGAACTTA<br/>           CGTACCAAGTAACATTTTCAAAGACAATAACTATAGTAATCCAGAAGTAATCGAGGGTTTTCTTAAATGG<br/>           ACTAGTAATCGTCATAGTGTGCGATCTCCCATCGCCGTTGTAAGCGCAGGTGGGCACCATCACCATACCA<br/>           CTGAGCTTATGTCTC</p>                                                                                                                                                                                                                                                                                                                                                                                                                                                                                                                                                 |
| <p><b>His-MBP-TEV</b><br/>           ATGGGCAGCAGCCATCATCATCATCATATGAAAATCGAAGAAGGTAAACTGGTAATCTGGATTAACGG<br/>           CGATAAAGGCTATAACGGTCTCGCTGAAGTCGGTAAGAAATTCGAGAAAGATACCGGAATTAAGTCCAC<br/>           GTTAGACTCCGGATAAACTGGAAGAGAAATTTCCACAGTTTGGCGCAACTGGCGATGGCCCTGACATTAT<br/>           CTTCTGGGACACCGCTTTGGTGGCTACGCTCAATCTGGCCTGTTGGCTGAAATCACCCCGGACAAAG<br/>           CGTTCCAGGACAAGCTGTATCCGTTTACCTGGGATGCCGTACGTTACAACGGCAAGCTGATTGCTTACCCGA<br/>           TCGCTGTTGAAGCGTTATCGCTGATTTATAACAAAGATCTGCTGCCGAACCCGCCAAAAACCTGGGAAGAG<br/>           ATCCCGGCGCTGGATAAAGAAGTGAAGCGAAAGGTAAGAGCGCGCTGATGTTCAACCTGCAAGAACCCT<br/>           ACTTACCTGGCCGCTGATTGCTGCTGACGGGGTTATGCGTTCAAGTATGAAAACGGCAAGTACGACATT<br/>           AAAGACGTGGGCGTGGATAACGCTGGCGGAAAGCGGGTCTGACCTTCTGGTTGACCTGATTAATAAACA<br/>           ACATAGTAATCGAGACACCGATTACTCCATCGCAGAAGTGCCTTTAATAAAGGCGAAACAGCGATGACC<br/>           ATCAACGGCCCGTGGCATGGTCCAACATCGACACAGCAAGTGAATTATGGTGTAAACGGTACTGCGGAC<br/>           CTTCAAGGGTCAACCATCCAAACCGTTTGGTGGCTGCTGAGCGCAGGTATTAACGCCGCCAGTCCGAACA<br/>           AAGAGCTGGCAAAAGAGTTTCTCGAAAACCTATCTGCTGACTGATGAAGGTCTGGAAGCGGTTAATAAAGA<br/>           CAAACCGCTGGGTGCCGTAGCGCTGAAGTCTTACGAGGAAGAGTTGGCGAAAGATCCACGTATTGCCGCCA<br/>           CTATGGAAAACGCCAGAAAGGTGAAATCATGCCGAACATCCCGCAGATGTCCGCTTTCTGGTATGCCGTG<br/>           CGTACTGCGGTGATCAACGCCGCCAGCGGTGCTCAGACTGTCGATGAAGCCCTGAAAGACGCGCAGACTA<br/>           ATTCGAGCTCGAACAACAACAATAACAATAACAACAACCTCGGGATCGAGGAAAACCTGTATTTTCAG<br/>           GGCGAATTCGGATCCTTAGAGTCGACCTGCAGGCAAGCTT</p>                                                                                                                                                                                      |
| <p><b>XpSsp1-WP046932418.1-P3</b><br/>           GCTCCACCTACAGATACGGCAACTCCCCCCCCAGCGACGGGTTCCACCCGTGGTCCGGCGGCTGGCAAGGC<br/>           GGTGCTGGTGACCACCACGTGCCGTACCGACGCCGACTGTACCGTGAAGAACGTAGGTAATGTTGTGGCG<br/>           CATTTCGGCGTGCCTGAACGTCAACAGCGCGACCGACCCGAATGGTGTGTTGGCTCAGTGCCAAGCGGGT<br/>           GGCATGATGAGCGTTTGGCGCTTCCGCGAGATCTCTGCCTGCCAGTGCCTTGCAGGCCAGTGGCGAGCTAA<br/>           AGATGCCAAGCGGATACCCTGCGTCCGGCGACTCCGCCGACGGAAACCGTTCACTAG</p>                                                                                                                                                                                                                                                                                                                                                                                                                                                                                                                                                                                                                                                                                                                                                                                                                                                                                                                                                                                                                                                                                                                                                                                                                                                                                                             |
| <p><b>CfEcp36-KAH3648627.1-P5</b><br/>           AAAAGGGGTGAGGTGGAGAATGTAGAACAATCCGACTGTTGTTACTGCGACCCGGGTTCCGGCTGCAT<br/>           CCTGAGCTGTCAGGCAGATCGTTCTAGCACCACGGGCTATCGCTGCATTACCAGCCGTCAGTCGGCTTGCA<br/>           ACGTTGCCGGTTGCAGCTGCTAG</p>                                                                                                                                                                                                                                                                                                                                                                                                                                                                                                                                                                                                                                                                                                                                                                                                                                                                                                                                                                                                                                                                                                                                                                                                                                                                                                                                                                                                                                                                                                                              |

**FoTIL-XP\_018243121.1-P8**

GCTCCCAAGTGTAAGCAGGAGAACAATTTTCGAGTGCGGCACCGCTTGCCCCGTTGACGTGCGACAAACC  
GGAACCGCGTCCGTGTACCAAACAATGTGTTCCGGGTTGCTTTTGCAAGGAGGTGCGCATTCTGCGTCAA  
GCCAGAGTTCTGTGCGCCGCTCAAGGCGCTGTTGCTGCCGGTGAGCATCCACAACCGCCCAATCTCTGGT  
ATTTCCCATAGCCGTCACCTGTAG

**FoSix15-APP91304.1-P9**

ACAATATATTGTAGGGATGTATCACCACCCCGCGATACCCGTAGCTGGTGTAACGAACACCCCGGCGTG  
GCAAGGTTGCCAGCGTTTTTGCAGCGAGCACTGCCGCTCCACCCCGCTGACTACCCGGACGGCTGCATGT  
ATCATCTGCAGGTTGGCGGTGATTACGACTGTTTCTGCAAGTAG

**XP001545484.1-P6**

TTCACACCACCCGGATTTGAACCTAGTTCAACGAACGATCTGACCGTCGCATACGGCTCGAAACTTGCCAC  
CAACGGTATTCAAATGCTGCGTGCGGACACCCGCGTATGCTCCGATTCTGGGTACAGCGACCAAAATGTCCG  
GCACCTATGCGGTTATGATGGTTGATCCGGACATCCCGCCGGCAAAGGTGGGTGGTGACACCAGCCAATTT  
CTGCATTGGATGCAGGCAGACTTGACCAGCTCAAATACTACTACGACCATTTGGTGGCCAGAAAATCTACGA  
GCTGATTAACGTGAAGAATACCTCTGCCTTTGCGACGTACCTGCAGCCGAATCCGCCAGATATCGCTCCGA  
CCACCCACCGTTATACCCAGTTGCTCTTTAACACCACTGGCATGAATATGAGCTTGGCCAGCCTGCAAACG  
GCGGGTAAAACCCGCGGTAATTTCAACGCGACGAACGTTGTTAAGTCTGCTAAGTTAACGGTGCTGATGGG  
TAACTCCTTCGACGTGAGCTTCGGCGATAAAGCGATCAACAACACCCGGCGCGTCCACCGGCAGCAGCACCT  
AG

**WP\_011000405.1-P7**

GCTGATGATGTTCCCGTAGCGGACGCATCACTCCAACCGAGCGTTGAGGCGGCGCGCCACCGGTTGCTGC  
GGCGACCGTCGTGCAAGGTTTTGGCCAGGCAGTTGAGGCAAGCGCACTGGAAGGTTATCGTGGTGGTACGC  
AGCCGCTGTACCAGACCGTCAACGACGCGCGTTTTGTCCGGCACGGTGACCGATAATGCCGCGATTAACGTT  
GCTACTGGCGCTAATATTGTACGTGACGGCAGCTTCGCCAACGCCTCTGGCATCCCGACCGTTATTCAAAC  
ACCGGTGCGAACGTGCTGATCCAGAATGCGACCATCGTGAACGTGCAGTTCCGCCCGTAG

**WP008576433.1-P4**

CTGTATTTTCAGGGCGAATTCGGTTGTAATACAGTAGCTGGAGCAGGGAAAGACATGCAGGGTGCGGGTGA  
TAAAGTTGAGAAGACCGCTGAAAAGTGCAGCGACGGCAAATGTTAGGAATTCGGATCCTCTAGAGTC

**Supplementary Table 8** Used plasmids

| Plasmid   | Description                                            | Reference                  |
|-----------|--------------------------------------------------------|----------------------------|
| pJK187    | Binary vector (pL0V2-2x35S::SC)                        | This work                  |
| pET-32/28 | Bacterial expression vector                            | Novinec et al., 2012       |
| P19       | Binary vector carrying p19 silencing inhibitor         | Van der Hoorn et al., 2003 |
| pFH20     | Binary vector for P69B-His expression                  | This work                  |
| pHJ000    | Bacterial expression vector pET-32/28-His-MBP-TEV      | This work                  |
| pHJ028    | Bacterial expression P3(WP046932418.1, <i>XpSsp1</i> ) | This work                  |
| pHJ033    | Bacterial expression P5(KAH3648627.1, <i>CfEcp36</i> ) | This work                  |
| pHJ029    | Bacterial expression P6(XP001545484.1.)                | This work                  |
| pHJ032    | Bacterial expression P7(WP011000405.1)                 | This work                  |
| pHJ030    | Bacterial expression P8(XP_018243121.1, <i>FoTIL</i> ) | This work                  |
| pHJ031    | Bacterial expression P9(APP91304.1, <i>FoSix15</i> )   | This work                  |
| pHJ043    | Bacterial expression P4(WP008576433.1)                 | This work                  |
| pHJ046    | Bacterial expression <i>PiEpi1</i>                     | This work                  |
| pHJ047    | Bacterial expression <i>PiEpiC1</i>                    | This work                  |

**Supplementary Table 9** Primer sequences

| Primer    | Use        | Nucleotide sequence (5'-3')                       |
|-----------|------------|---------------------------------------------------|
| His-MBP-F | Cloning    | AAGAAGGAGATATACCATGGGCAGCAGCCATCATCATCATCATCATATG |
| His-MBP-R | Cloning    | TGGTGGTGGTGGTGTCTCGAGAAGCTTGCCTGCAG               |
| Epi1-F    | Cloning    | CTGTATTTTCAGGGCGAATTCCAAAGCCCGCAAGTCATCAG         |
| Epi1-R    | Cloning    | GACTCTAGAGGATCCGAATTCCTTATCCCTCCTGCGGTGTC         |
| EpiC1-F   | Cloning    | CTGTATTTTCAGGGCGAATTCCAAAGTGGACGGC GGATACTC       |
| EpiC1-R   | Cloning    | GACTCTAGAGGATCCGAATTCCTACTTAACTGGGGTAATCG         |
| P3-F      | Cloning    | CTGTATTTTCAGGGCGAATTCGCTCCACCTACAGATACGG          |
| P3-R      | Cloning    | GACTCTAGAGGATCCGAATTCCTAGTGAACGGTTTCCGTCCGG       |
| P4-F      | Cloning    | CTGTATTTTCAGGGCGAATTC                             |
| P4-R      | Cloning    | GACTCTAGAGGATCCGAATTC                             |
| P5-F      | Cloning    | CTGTATTTTCAGGGCGAATTCAAAAGGGGGTTCAGGTGGAGA        |
| P5-R      | Cloning    | GACTCTAGAGGATCCGAATTCCTAGCAGCTGCAACCCGCAA         |
| P6-F      | Cloning    | CTGTATTTTCAGGGCGAATTCCTCACACCACCCGATTTGA          |
| P6-R      | Cloning    | GACTCTAGAGGATCCGAATTCCTAGGTGCTGCTGCCGGTGG         |
| P7-F      | Cloning    | CTGTATTTTCAGGGCGAATTCGCTGATGATGTTCCCGTAGC         |
| P7-R      | Cloning    | GACTCTAGAGGATCCGAATTCCTACGGGCGGAACTGCACGT         |
| P8-F      | Cloning    | CTGTATTTTCAGGGCGAATTCGCTCCCAAGTGTAAGCAGG          |
| P8-R      | Cloning    | GACTCTAGAGGATCCGAATTCCTACAGGTGACGGCTATGGG         |
| P9-F      | Cloning    | CTGTATTTTCAGGGCGAATTCACAATATATTGTAGGGATGT         |
| P9-R      | Cloning    | GACTCTAGAGGATCCGAATTCCTACTTGCAGAAACAGTCGT         |
| PJK187-F  | Sequencing | CTATCCTTCGCAAGACCCTTC                             |
| PJK187-R  | Sequencing | CTCAACACATGAGCGAAACC                              |
| pet32a-F  | Sequencing | TAATACGACTCACTATAGGG                              |
| pet32a-R  | Sequencing | GCTAGTTATTGCTCAGCGG                               |
