# Supplementary material for: AlphaFold-Multimer predicts cross-kingdom interactions at the plant-pathogen interface
Source: PubMed Central journal article supplement (PMC10533508; doi:10.1038/s41467-023-41721-9), 2023-09-27
Supplement: 41467_2023_41721_MOESM3_ESM.pdf [file 41467_2023_41721_MOESM3_ESM.pdf]

## **Description of Additional Supplementary Files:**

**Supplementary Data 1:** Used scripts (.zip file)

**Supplementary Data 2:** Protein sequences of inhibitors and proteases used for Fig.1 (.doc)

**Supplementary Data 3:** PDB files of 5 controls and 15 candidate complexes (.zip)

**Supplementary Data 4:** Sequences of six hydrolases used for AFM screen (.doc)

**Supplementary Data 5:** Sequences of mature SSPs used for AFM screen (.fasta)

**Supplementary Data 6:** Raw values for graphs (.xlsx)

**Supplementary Data 7:** All ipTM+pTM scores for 11,274 protein pairs (.tsv)

**Supplementary Data 8:** Best ipTM+pTM scores for 11,274 protein pairs (.tsv)
